# Supplementary material
Source: Springer Nature journal article supplement (https://www.springermedizin.de/resource/supplementary/12884_2013_1031_MOESM4_ESM.pdf/9458766)

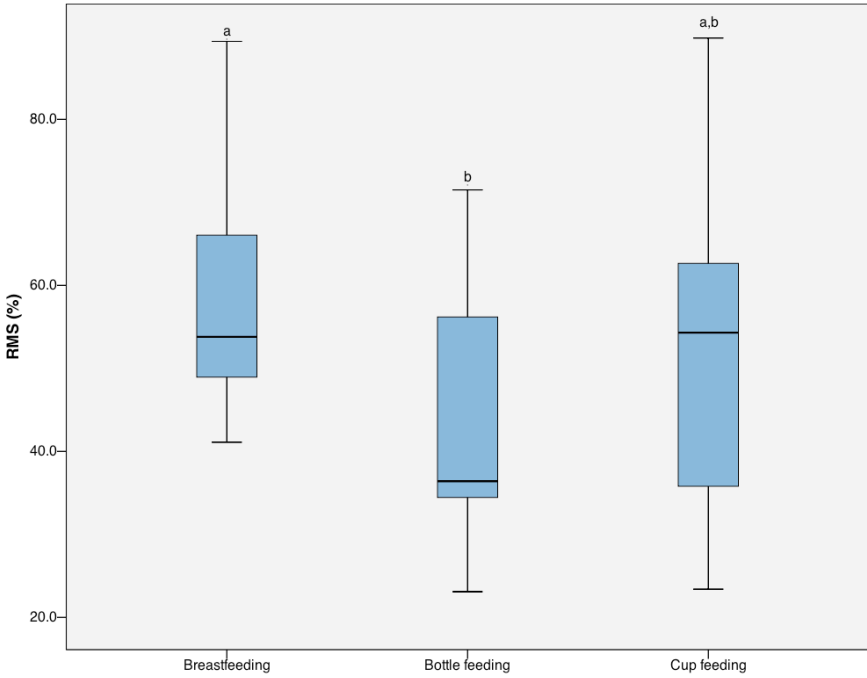

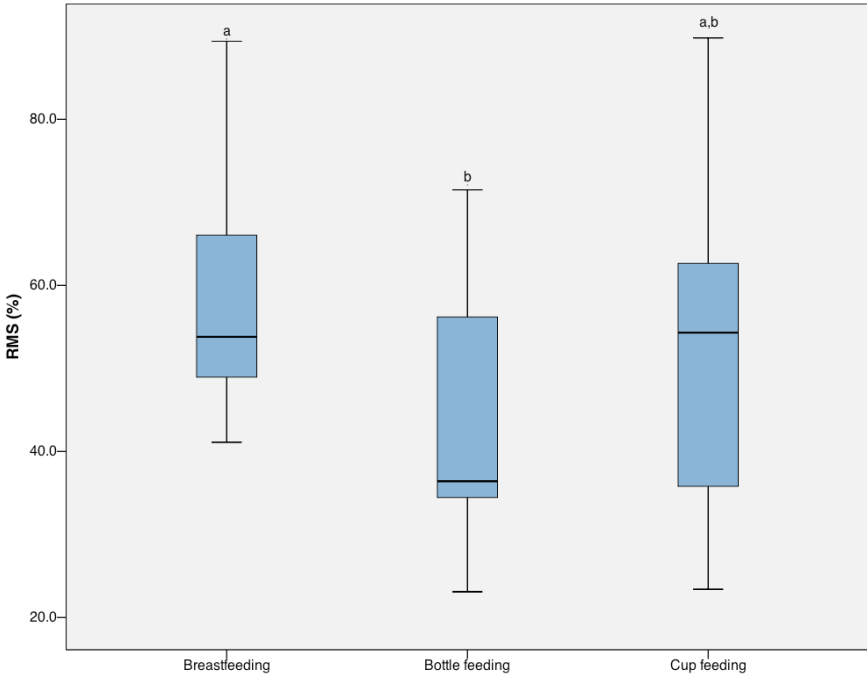

Supplement: MOESM4 [file 9458766]
